# Supplementary material
Source: PubMed Central journal article supplement (PMC4441226)
Supplement: NIHMS690628-supplement-Supporting_Information.pdf [file NIHMS690628-supplement-Supporting_Information.pdf]

**Supporting Information Table 1. Sequences of primers used for quantification of DNA from ChIP assays, their genomic locations and Runx1/RORyt binding sites flanked by primers.**

| Pair | Gene          | Binding Site and sequence | Sequence                                                            | Location                         |
|------|---------------|---------------------------|---------------------------------------------------------------------|----------------------------------|
| 1    | <i>rorc</i>   | Runx1,<br>TGTGGT          | F: 5' CCCAAGGGGTGCCAAGTTAC 3'<br>R: 5' CAGAGCCTCTCTCCAGGCTT 3'      | 0.1 kb upstream of the 3rd exon. |
| 2    | <i>rorc</i>   | Runx1,<br>TGTGGT          | F: 5' CGGCTGTAGCTGTGGTTTTG 3'<br>R: 5' GTATGATGACAGGCACCCCA 3'      | 2 kb upstream of the 3rd exon.   |
| 3    | <i>il-17a</i> | Runx1,<br>TGTGGT          | F: 5' GCCCATAAAGAAGCCAATGTTGT 3'<br>R: 5' CAGCCTAGGCAATGTCCTCTT 3'  | Promoter, -1.5 Kb                |
| 4    | <i>il-17a</i> | Roryt,<br>AGGTCA          | F: 5' TGGGACCTAATGACCCCCATA 3'<br>R: 5' AGGCTGAAAGACAGTGGAGAC 3'    | Promoter, -0.9Kb                 |
| 5    | <i>il-17a</i> | Roryt,<br>TGACCT          | F: 5' CCGTTTAGACTTGAAACCCAGTC 3'<br>R: 5' GTACCTATGTGTTAGGAGGCGC 3' | Enhancer CNS-5, -5 Kb            |

Primer pairs were designed for real time PCR in ChIP assay. The sequence of the 5<sup>th</sup> pair are obtained from a previous report.

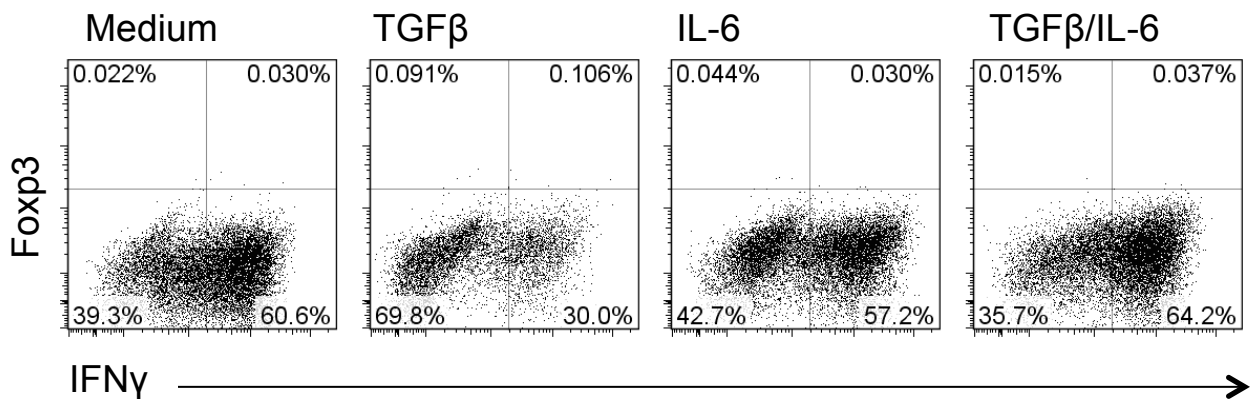

**Supporting Information Figure 1. TGF $\beta$  and IL-6 did not stimulate Th1 cells to convert into Foxp3<sup>+</sup> Treg cells.** FACS sorted CBir1 Tg IFN $\gamma$ <sup>Thy1.1+</sup> CD4<sup>+</sup> cells were cultured with irradiated splenic CD4<sup>+</sup> APCs and different cytokines in the presence of anti-IL-2 and anti-IFN $\gamma$  antibodies for 5 days. The expression of Foxp3 was examined by flow cytometry.

```

Mouse CCTGGCGAGTGGAAACAGCTTTTACCGCG - - - GCTGTAGC TGTGGTTTTG
Human CCTGGCGGGTGGAAACAGCTTTTACCGCGTGTGGCTGTCGCATGTGGITTTG

Mouse GCTTTGTGGTGGCAGAGCCAGGTTTGGTGTTCATCTCTGTGGTTAACACATT
Human GCTCTGTGGT - CCTGAGCCAGGTTTGGTGTTCATCTCTGTGGTTAACACATC

```

**Supporting Information Figure 2. Identification of consensus Runx1 binding sites in human and mouse rorc locus.** Alignment of intron regions of mouse and human rorc genes. The location of Runx1 consensus binding sites are underlined in the aligned sequences. Alignment was made by Blast basic local alignment search tool, program BLASTN 2.2.28+.
